# Supplementary material for: Biosynthesis of Fatty Acid Derivatives by Recombinant <em>Yarrowia Lipolytica</em> Containing Msexd2 and Msexd3 Desaturase Genes from <em>Manduca Sexta</em>
Source: Preprints.org preprint supplement (doi:10.20944/preprints202212.0439.v1), 2022-12-23
Supplement: Supplementary file 1 [file Supplementary material.docx]

Gene name: MsexD2, Length: 1005 bp, Sequence:

CCCCGGATCCGGTCTCTAATGGCCCCCAACTTCGGTACCG
AGATGTCTGCCCACATCGACGCTGAGGAGTCCTACGAGAAGCTGA
TCCCTCCCCAGGCTGCTCCCCGAAAGTACAAGTACCTGTACGCCA
ACATGATCTACTTCGCCTACTGGCACATCGCTGGACTGTACGGTA
TCTACCTGGCTTTCACCTCTGCCAAGTGGGCTACCATCATTCTGG
CCTACCTGCTGTTCGTGGCTGGCGACATTGGAGTGACCGCTGGAG
CTCACCGACTGTGGGCTCACAAGTCTTACAAGGCTAAGCTGCCCC
TGCAGATCCTGCTGATGCTGTTCTCCACCATGGCCTTCCAGAACA
CCGTGATTACCTGGGTCAAGGACCACCGAATGCACCACAAGTACT
CTGACACCGACGCCGACCCCCACAACGCTACCCGAGGTTTCTTCT
ACTCCCACGTGGGCTGGCTGATGGTCAAGCGACACCCCGAGGCTA
TCAAGCGGGGCAAGTCTCTGGACATGTCCGACATCTACAACAACC
CCGTGCTGAAGTTCCAGAAGAAGTACGCCATCCCCCTGGTGACCA
CCATTGCTTTCGTCCTGCCCACCATCATTCCCATGTACTTCTGGG
ACGAGTCTTTCAACGTCGCCTGGCACATGACCATGCTGAAGTACA
TCTTCGGACTGAACGCCGCTTTCCTGGTGAACTCTGTCGCCCACA
TGTGGGGTTACAAGCCCTACGACAAGAACATCGCTCCCACCCAGT
CCTACATTGCCACCTTCGCTACCCTGGGCGAGGGATTCCACAACT
ACCACCACGTGTTCCCTTGGGACTACCGAGCTTCTGAGCTGGGCG
ACAACTACCTGAACTTCACCACCAAGTTCATCGACTTCTTCGCCT
GGATTGGATGGGCTTACGACCTGAAGGCTGCTCCTGAGGACCTGG
TCCAGAAGCGAATTGAGCGAACCGGTGACGGCACCAAGCTGTAGT
CTAAGAGACCCCTAGGCCCC

Gene name: MsexD3, Length: 1065 bp, Sequence:

CCCCGGATCCGGTCTCTAATGGCCCCCAACTTCGGAAACG
AGGTGTCTTCCCCCATCGTCGCTGAGGAGTCTTACGAGAAGCTGA
TCCCTCCCCAGGCTGCTCCCCGAAAGTACAAGTACCTGTACGCCA
ACATGATCTACTTCACCTACTGGCACATTGCCGGCCTGTACGGAA
TCTACCTGGCTATTACCACCGCCAAGTGGGCTACCATCATTCTGG
CCTACCTGCTGTTCGTGGCTGGAGAGATCGGCATTACCGCTGGTG
CTCACCGACTGTGGGCTCACAAGTCCTACAAGGCTAAGCTGCCCC
TGCAGATCCTGCTGATGCTGTTCAACTCTACCGCCTTCCAGAACT
CCGTGATTACCTGGGTCAAGGACCACCGAATGCACCACAAGTACT
CTGACACCGACGCCGACCCCCACAACGCTACCCGAGGATTCTTCT
ACTCCCACGTGGGTTGGCTGATGGTCAAGCGACACCCCGAGGCTA
TCAAGCGGGGCAAGTCTCTGGACATGTCCGACATCTACAACAACC
CCGTGCTGAAGTTCCAGAAGAAGTACGCCATCCCCCTGATTACCA
CCGTGGCTTTCGTCCTGCCCACCATCATTCCCATGTACTTCTGGG
ACGAGTCTTTCAACGTCGCCTGGCACATGACCATGCTGCGATACA
TCATTAACCTGAACACCATCTTCCTGGTGAACTCCGTCGCCCACA
TGTGGGGCTACAAGCCCTACGACAAGAACATCGCTCCCACCCAGA
ACTACATTGCCACCTTCGCTACCCTGGGCGAGGGATTCCACAACT
ACCACCACGCCTTCCCCTGGGACTACCGAGCTTCTGAGCTGGGCA
ACAACTACCTGAACCTGACCACCAAGTTCATCGACTTCTTCGCCT
GGATTGGATGGGCTTACGACCTGAAGACCGTCCCCGAGGACCTGC
TGCAGAAGCGAATGGAGCGAACCGGTGACGGCACCAACCTGTGGG
GACGAGGTGACAAGAACATGAAGAAGGACTACGTGAAGTCCACCG
ACGTCCACGAGTAGTCTAAGAGACCCCTAGGCCCC

FigureS1 Gene sequences of *MsexD2* and *MsexD3*


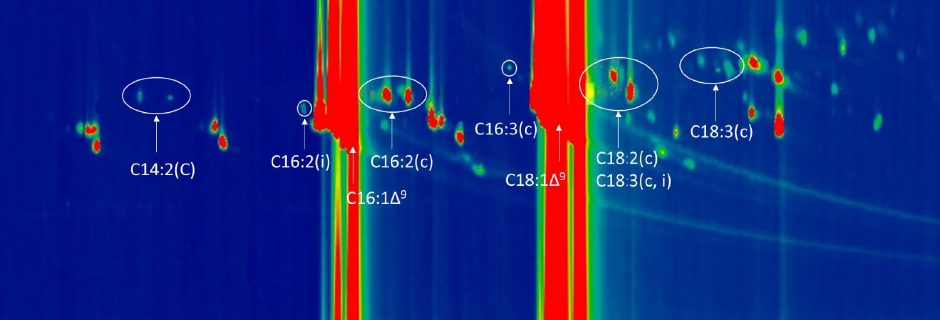


Figure S2: GCxGC-MS chromatogram of yeast sample 7084 (co-cultured with C16:2Δ10,12-Me) with description and location of new fatty acids. (c) – conjugated double bonds, (i) – isolated double bonds, (c, i) – one conjugated and one isolated double bond. Oleic and palmitoleic FAs are highlighted for better orientation in chromatogram.
